# Supplementary material for: Vibrational and structural analysis of the radical cation of N,N,N′,N′-tetramethylbenzidine based on ab initio calculations and time-resolved resonance Raman spectroscopyElectronic supplementary information (ESI) available: Potential energy distributions (PED) expressed in terms of the local symmetry coordinates for each isotopomer (Table 1S and 3S); description of the symmetry coordinates (Table 2S) and related internal coordinates (Fig. 1S). See http://www.rsc.org/suppdata/cp/b2/b210837m/
Source: Royal Society of Chemistry journal article supplement (doi:10.1039/b210837m), 2003-01-23
Supplement: figure_1s.doc [file figure_1s.doc]

**Figure 1S**Atomic numbering and internal coordinates of TMB. In the benzyl ring, 2 is, e.g., the angle formed by the C2H2 bond and the plane of the three atoms C1, C3, C2, all four atoms being in one plane in the equilibrium position; t23 is, e.g., the dihedral angle C1C2C3C4, between the two planes defined by atoms C1, C2, C3 and C2, C3, C4, respectively.
