# Supplementary material for: Vibrational and structural analysis of the radical cation of N,N,N′,N′-tetramethylbenzidine based on ab initio calculations and time-resolved resonance Raman spectroscopyElectronic supplementary information (ESI) available: Potential energy distributions (PED) expressed in terms of the local symmetry coordinates for each isotopomer (Table 1S and 3S); description of the symmetry coordinates (Table 2S) and related internal coordinates (Fig. 1S). See http://www.rsc.org/suppdata/cp/b2/b210837m/
Source: Royal Society of Chemistry journal article supplement (doi:10.1039/b210837m), 2003-01-23
Supplement: table_1s.doc [file table_1s.doc]

**Table 1S** Experimental Raman and scaled B3LYP frequencies (cm-1) of some specific totally symmetric modese of S0 TMB*-h20*, *-d8*, *-d12* and *-d20* (300-1800 cm-1 region). The calculated PEDs (contributions higher than 10%) and approximate description of the modes are also given.

| Approximate descriptiona,b,c | TMB – *h20* | |  | TMB – *d8* | |  | TMB – *d12* | |  | TMB – *d20* | |
| --- | --- | --- | --- | --- | --- | --- | --- | --- | --- | --- | --- |
| Raman |  calc.  PED (%) |  | Raman  ()d |  calc. ()d  PED (%) |  | Raman  ()d |  calc. ()d  PED (%) |  | Raman  ()d |  calc. ()d  PED (%) |
|  ring +  (CH)]  (8a) | 1604 | 1623 |  | 1579 | 1594 (-29) |  | 1602 | 1622 (-1) |  | 1577 | 1592 (-31) |
|  | R2(38), R3(12), 3(14), 2(12) |  | (-25) | R2(40), R3(15), R1(12) |  | (-2) | R2(38), R3(13), 3(15), 2(13) |  | (-27) | R2(41), R3(16), R1(12) |
|  (CH) +  ring]  (19a) | 1539 | 1539 |  | 1491 | 1490 (-49) |  | 1536 | 1534 (-5) |  | 1469 | 1467 (-72) |
|  | R3(18), R1(16), R(15), RN(17), 2(30), 3(30) |  | (-48) | RN(23), R(17), R3(17), R1(10), 7a2(17), 7a1(13) |  | (-3) | R3(18), R1(17), R(15), RN(14),  2(34), 3(29) |  | (-70) | RN(36), R(30), R1(22),  R3(24), 2(12), 3(10) |
| a (CH3) |  | 1512 |  |  | 1514 |  |  | 1085 |  |  | 1086 |
|  | 7a1(100) |  |  | 7a1(100) |  |  | 7a1(100) |  |  | 7a1(100) |
| a (CH3) |  | 1466 |  | 1463 | 1466 |  |  | 1057 |  | 1050 | 1058 |
|  | 7a2(100) |  |  | 7a2(100) |  |  | 7a2(100) |  |  | 7a2(100) |
| s (CH3) |  | 1467 |  | 1446 | 1443 |  |  | 1149 |  | 1128 | 1138 |
|  | 7s(82), 2(14) |  |  | 7s(10), RN(19), R3(19), R1(22), R(30), R7(11) |  |  | 7s(15), R7(82) |  |  | 7s(16), R7(56), 2(13) |
| sNring | 1359 | 1347 |  | 1341 | 1332 (-15) |  | 1358 | 1339 (-8) |  | 1328 | 1318 (-29) |
|  | RN(52), R7(19), N(12), 7a (13) |  | (-18) | RN(37), R7(15), N(10), 7a(15), R(13) |  | (-1) | RN(64), R7(12) |  | (-31) | RN(46), R(18), R2(14), R7(11) |
| ir | 1288 | 1289 |  | 1195 | 1202 (-87) |  | 1288 | 1290(+1) |  | 1182 | 1180 (-109) |
|  | R(51), 2(14) |  | (-93) | R(24), R1(12), R2(11), 7a(26) |  | (+0) | R(51), 2(14), R2(13) |  | (-106) | R(26), R7(14), R1(12), 2(15) |
|  (CH)  (9a) | 1216 | 1206 |  | 887 | 879 (-328) |  | 1219 | 1207 (+1) |  | 888 | 878 (-328) |
|  | 3(41), 2(28) |  | (-329) | 3(45), 2(27) |  | (+3) | 3(40), 2(29) |  | (-328) | 3(45), 2(25) |
| CH3) | 1164 | 1172 |  | 1128 | 1129 (-43) |  | 1036 | 1029 (-143) |  |  | 1006 |
|  | 7a(56), RN(10) |  | (-36) | 7a(72), S1(10), 2(10) |  | (-138) | 7a(38), R1(25), N(13) |  |  | 7a(40), S1(15), N(13) |
| CH3) | 1109 | 1116 |  | 1105 | 1115 (-1) |  |  | 852 |  |  | 852 |
|  | 7b(100) |  | (-4) | 7b(100) |  |  | 7b(100) |  |  | 7b(100) |
|  ring + ring] (18a) | 1006 | 999 |  | 845 | 838 (-161) |  | 990 | 997 (-2) |  | 859 | 851 (-148) |
|  | S1(45), R1(30), R3(27), 2(14) |  | (-161) | 2(38), 3(20), R1(17), S1(11) |  | (-16) | S1(51), R3(27), R1(12) |  | (-147) | 2(28), S1(14), 3(12), 7a(12) |
| s(NC2) | 953 | 944 |  | 946 | 937 (-7) |  | 830 | 826 (-118) |  | 813 | 809 (-135) |
|  | R7(56), 7a (12) |  | (-7) | R7(60), S1(11), 7a (10) |  | (-123) | R7(20), 7a (33) |  | (-137) | R7(27), R1(14), 3(10), 7a(28) |
| ring + (CH)]  (17a) |  | 919 |  | 740 | 737 |  |  | 920 |  |  | 737 |
|  | S5(40), 3(50), 2(18) |  |  | S5(23), 3(63), 2(29) |  |  | S5(41), 3(54), 2(20) |  |  | S5(23), 3(62), 2(24) |
|  (CH)  (10a) | 797 | 793 |  | 626 | 619 (-174) |  | 784 | 792 (-1) |  | 627 | 619 (-174) |
|  | 2(88), 3(30) |  | (-171) | 2(85), (30) |  | (-13) | 2(85), 3(29) |  | (-170) | 2(84), (31) |
|  ring + ring]  (1) | 783 | 782 |  | 758 | 753 (-29) |  | 767 | 767 (-15) |  | 745 | 740 (-42) |
|  | S2(17), R1(12), R3(15), R7(15) |  | (-25) | S2(16), R1(12), R3(11), R7(12) |  | (-16) | S2(19), R(11), R7(24), R3(15) |  | (-38) | S2(18), R7(16), R3(13), 2(11) |
| mix | 631 | 625 |  | 612 | 605 (-20) |  | 597 | 592 (-33) |  | 580 | 574 (-49) |
|  | RN(20), R(13), R7(21), S1(10), N(16) |  | (-19) | RN(15), N(18), R7(16), R(11), S1(10) |  | (-34) | RN(25), R7(24), R(14), S1(10) |  | (-51) | RN(22), R7(20),), R(12), N(10), S1(10) |
| s (NC2) | 462 | 459 |  | 466 | 461 (+2) |  | 401 | 404 |  | 399 | 398 (-61) |
|  | N(66) |  | (+4) | N(42) |  | (-61) | N(45), S4(15) |  | (-63) | N(60) |
|  ring +  (CH)]  (16a) | 416 | 416 |  | 368 | 367 (-49) |  | 413 | 416 (+0) |  | 364 | 366 (-50) |
|  | S5(55), 2(14), 3(16) |  | (-48) | S5(76) |  | (-3) | S5(56), 2(12), 3(14) |  | (-52) | S5(76) |
| a The description corresponds to the perhydrogenated derivative. b Assignments with Wilson notation are given in parentheses. c  = stretching; ,  = in-plane bending; ,  = out-of-plane bending. d  is the frequency shift relative to the value to the perhydrogenated derivative. e Modes that would remain totally symmetric if the molecule symmetry was D2. | | | | | | | | | | | |
