# Supplementary material for: Vibrational and structural analysis of the radical cation of N,N,N′,N′-tetramethylbenzidine based on ab initio calculations and time-resolved resonance Raman spectroscopyElectronic supplementary information (ESI) available: Potential energy distributions (PED) expressed in terms of the local symmetry coordinates for each isotopomer (Table 1S and 3S); description of the symmetry coordinates (Table 2S) and related internal coordinates (Fig. 1S). See http://www.rsc.org/suppdata/cp/b2/b210837m/
Source: Royal Society of Chemistry journal article supplement (doi:10.1039/b210837m), 2003-01-23
Supplement: table_2s.doc [file table_2s.doc]

**Table 2S** Local symmetry coordinates of TMB, as recommended by Pulay *et al* 27

| Definitiona | **Description** |
| --- | --- |
| **In-plane coordinates** | |
| R1, R2, R3, R4, R5, R6, R1', R2', R3', R4', R5', R6' | CC stretching |
| RN, RN', R7, R8, R7', R8' | CN stretching |
| r2, r3, r5, r6, r2', r3', r5', r6' | CH (ring) stretching |
| r7a, r7b, r7c, r8a, r8b, r8c, r7a', r7b', r7c', r8a', r8b', r8c' | CH (methyl) stretching |
| R | Interring stretching |
| i = (1/2)(bi-ci); i' = (1/2)(bi'-ci'); i = 2, 3, 5, 6 | CH in-plane bending |
| 1 = (1/2)(b1-c1); 1' = (1/2)(b1'-c1') | NC in-plane bending |
| 4 = (1/2)(b4-c4); 4' = (1/2)(b4'-c4') | C-ring in-plane bending |
| N = 2aN – bN - cN | NC2 scissoring |
| N' = 2aN' – bN' - cN' |  |
| N = bN - cN | NC2 rocking |
| N' = bN' - cN' |  |
| S1 = a1 – a2 + a3 – a4 + a5 – a6 | Ring in-plane deformation |
| S1' = a1' – a2 '+ a3' – a4' + a5' – a6' |  |
| S2 = 2a1 – a2 – a3 + 2a4 – a5 – a6 | Ring in-plane deformation |
| S2' = 2a1' – a2' – a3' + 2a4' – a5' – a6' |  |
| S3 = a2 – a3 + a5 – a6 | Ring in-plane deformation |
| S3' = a2' – a3' + a5' – a6' |  |
| **Out-of-plane coordinates** | |
| 2, 3, 5, 6, 2', 3', 5', 6' | CH out-of-plane bending |
| 4, 4' | C-ring out-of-plane bending |
| 1, 1' | NC (ring) out-of-plane bending |
| 7, 8, 7', 8' | NC (methyl) out-of-plane bending |
| S4 = t12 – t23 + t34 – t45 + t56 – t61 | Ring out-of-plane deformation |
| S4' = t1'2' – t2'3' + t3'4' – t4'5' + t5'6' – t6'1' |  |
| S5 = t12 – 2t23 + t34 + t45 - 2t56 + t61 | Ring out-of-plane deformation |
| S5' = t1'2' – 2t2'3' + t3'4' + t4'5' - 2t5'6' + t6'1' |  |
| S6 = t12 – t34 + t45 – t61 | Ring out-of-plane deformation |
| S6' = t1'2' – t3'4' + t4'5' – t6'1' |  |
|  | Interring torsion |
| **Methyl groups vibrations** | |
| is = ia + ib + ic – ia – ib - ic (i = 7, 8) | Symmetric deformation |
| is' = ia' + ib' + ic' – ia' – ib' - ic' (i = 7, 8) |  |
| ia1 = 2ia - ib - ic (i = 7, 8) | Asymmetric deformation |
| ia1' = 2ia' - ib' - ic' (i = 7, 8) |  |
| ia2 = ib - ic (i = 7, 8) | Asymmetric deformation |
| ia2' = ib' - ic' (i = 7, 8) |  |
| ia = 2ia – ib - ic (i = 7, 8) | CH3 rocking |
| ia' = 2ia' – ib' - ic' (i = 7, 8) |  |
| ib = ib - ic (i = 7, 8) | CH3 rocking |
| ib' = ib' - ic' (i = 7, 8) |  |
| ti (i = 7, 8) | N(CH3) torsion |
| ti' (i = 7, 8) |  |
| a The atom numbering and the notation of internal coordinates are given in Figure 1S. | |
