# Supplementary material for: Vibrational and structural analysis of the radical cation of N,N,N′,N′-tetramethylbenzidine based on ab initio calculations and time-resolved resonance Raman spectroscopyElectronic supplementary information (ESI) available: Potential energy distributions (PED) expressed in terms of the local symmetry coordinates for each isotopomer (Table 1S and 3S); description of the symmetry coordinates (Table 2S) and related internal coordinates (Fig. 1S). See http://www.rsc.org/suppdata/cp/b2/b210837m/
Source: Royal Society of Chemistry journal article supplement (doi:10.1039/b210837m), 2003-01-23
Supplement: table_3s.doc [file table_3s.doc]

**Table 3S** Experimental Raman and scaled B3LYP and ROHF frequencies (cm-1) of the totally symmetric modes of TMB+.*-h20*, *-d8*, *-d12* and *-d20* (300-1800 cm-1 region) in the hypothesis of D2 symmetry. The PEDs calculated by B3LYP (contributions greater than 10%) and approximate description of the modes are also given.

| Approximate descriptiona,b,c | TMB – *h20* | |  | TMB – *d8* | |  | TMB – *d12* | |  | TMB – *d20* | |
| --- | --- | --- | --- | --- | --- | --- | --- | --- | --- | --- | --- |
| Raman | B3LYP / ROHF  PED (%) |  | Raman  ()d | B3LYP ()d / ROHF ()d  PED (%) |  | Raman  ()d | B3LYP ()d / ROHF ()d  PED (%) |  | Raman  ()d | B3LYP ()d / ROHF ()d  PED (%) |
|  ring +  (CH)]  (8a) | 1603 | 1623 / 1642 |  | 1568 | 1587 (-36) / 1603 (-39) |  | 1603 | 1622 (-1) / 1641 (-1) |  | 1570 | 1585 (-38) / 1601 (-41) |
|  | R2(48), 3(21), 2(18) |  | (-35) | R2(52), R3(10), R1(11) |  | (+0) | R2(48), 3(20), 2(15) |  | (-33) | R2(52), R3(12), R1(13) |
|  (CH) +  cycle]  (19a) + sN-ring | 1558 | 1559 / 1558 |  | 1535 | 1541 (-18) / 1540 (-18) |  | 1546 | 1551 (-8) / 1547 (-11) |  | 1512 | 1503 (-55) / 1505 (-53) |
|  | RN(34), R1(12), R3(11), R(14), 2(15), 3(15) |  | (-23) | RN(39), 7a1(48) |  | (-12) | RN(26), R3(13), R1(13), R(17), 2(25), 3(27) |  | (-46) | RN(59), R(24), R1(14),  R3(10) |
| a(CH3) | 1490 | 1523 / 1513 |  | 1460 | 1498 (-25) / 1492 (-21) |  |  | 1087 / 1082 |  |  | 1087 / 1082 |
|  | 7a1(74), 2(10), 3(10) |  | (-30) | 7a1(54), RN(19), R(13) |  |  | 7a1(100) |  |  | 7a1(100) |
| a(CH3) |  | 1482 / 1475 |  |  | 1481 / 1474 |  |  | 1067 / 1064 |  |  | 1067 / 1063 |
|  | 7a2(100) |  |  | 7a2(100) |  |  | 7a2(100) |  |  | 7a2(100) |
| s(CH3) |  | 1476 / 1474 |  | 1431 | 1460 / 1456 |  |  | 1142 / 1142 |  | 1117 | 1138 / 1138 |
|  | 7s(67), 2(11) |  |  | 7s(18), R(34), RN(20), R7(17), R3(14), R1(12) |  |  | 7s(19), R7(90) |  |  | 7s(22), R7(84) |
| sN-ring | 1402 | 1412 / 1417 |  | 1380 | 1387 (-25) / 1395 (-22) |  | 1434 | 1421 (+9) / 1429 (+12) |  | 1392 | 1385 (-27) / 1394 (-23) |
|  | RN(53), R7(15), 3(10) |  | (-22) | RN(32), R(36) |  | (+32) | RN(60), 3(12) |  | (-10) | RN(34), R(41), R3(11) |
| ir | 1342 | 1340 / 1342 |  | 1235 | 1221 (-119) / 1215 (-127) |  | 1344 | 1341 (+1) / 1343 (+1) |  | 1205 | 1203 (-137) / 1190 (-152) |
|  | R(55), 2(19) |  | (-107) | R(19), R1(14), 7a(25), 2(14) |  | (+2) | R(56), 2(19) |  | (-137) | R(21), R1(17), 2(24), 3(20) |
|  (CH)  (9a) | 1232 | 1237 / 1233 |  | 891 | 892 (-345) / 886 (-347) |  | 1232 | 1235 (-2) / 1231 (-2) |  | 896 | 894 (-343) / 889 (-334) |
|  | 3(35), 2(26) |  | (-341) | 3(45), 2(26) |  | (+0) | 3(34), 2(29) |  | (-336) | 3(44), 2(32) |
|  (CH3) | 1178 | 1180 / 1184 |  |  | 1148 / 1149 |  | 1037 | 1033 (-147) / 1021 (-163) |  | 1026 | 1017 (-163) / 1010 (-174) |
|  | 7a (58), RN(10), N(10) |  |  | 7a(44), 3(12), 2(11), S1(10) |  | (-141) | 7a(38), R1(23), N(17) |  | (-152) | 7a(40), N(16), S1(13) |
|  (CH3) |  | 1109 / 1115 |  |  | 1109 / 1115 |  |  | 846 / 848 |  |  | 846 / 848 |
|  | 7b(100) |  |  | 7b(100) |  |  | 7b(100) |  |  | 7b(100) |
|  ring + ring]  (18a) | 991 | 991 / 971 |  | 836 | 839 (-152) / 824 (-147) |  | 980 | 990 (-1) / 971 (+0) |  | 856 | 855 (-136) / 844 (-127) |
|  | S1(46), R1(33), R3(32), 3(12) |  | (-155) | 2(38), 3(16), R1(21), S1(12) |  | (-11) | S1(51), R3(34), R1(22), 2(10) |  | (-135) | 2(26), S1(18), 3(12), 7a(21) |
| ring + (CH)]  (17a) |  | 949 / 990 |  |  | 763 / 802 |  |  | 946 / 989 |  |  | 763 / 803 |
|  | S5(31), 3(37), 2(11) |  |  | S5(20), 3(52), 2(31) |  |  | S5(38), 3(45), 2(26) |  |  | S5(20), 3(54), 2(32) |
| s(NC2) | 939 | 938 / 925 |  | 945 | 938 (+0) / 928 (+3) |  | 830 | 828 (-110) / 820 (-105) |  | 810 | 810 (-128) / 796 (-131) |
|  | R7(42), 7a(10) |  | (+6) | R7(52), S1(11), 7a(10) |  | (-109) | R7(16), 7a(46), R1(12) |  | (-129) | R7(20), R1(20), 7a(32) |
|  (CH)  (10a) |  | 789 / 799 |  |  | 622 / 627 |  |  | 787 / 798 |  |  | 619 /626 |
|  | 2(65), 3(43) |  |  | 2(46), 3(22) |  |  | 2(70), 3(48) |  |  | 2(74), 3(40) |
|  ring + ring]  (1) | 779 | 779 / 757 |  | 758 | 756 (-23) / 735 (-22) |  | 764 | 763 (-16) / 742 (-15) |  | 742 | 740 (-39) / 720 (-37) |
|  | S2(14), R1(15), R3(18), R7(19) |  | (-21) | S2(13), R1(14), R3(15), R7(19) |  | (-15) | S2(15), R7(28), R3(18) |  | (-37) | S2(15), R7(25), R3(18) |
| mix |  | 636 / 626 |  | 625 | 613 / 601 |  | 605 | 605 / 592 |  | 590 | 586 / 574 |
|  | RN(13), R(11), R7(28), S1(10), N(14) |  |  | RN(22), N(18), R7(18), R(10), S1(10) |  |  | RN(16), R7(30), R(12), S1(10) |  |  | RN(25), R7(14),), R(11), S1(10) |
| s(NC2) | 480 | 471 / 463 |  | 475 | 466 (-5) / 458 (-5) |  | 416 | 423 (-48) / 416 (-47) |  | 415 | 415 (-56) / 408 (-55) |
|  | N(76) |  | (-5) | N(75) |  | (-64) | N(40), S5(24) |  | (-65) | N(75) |
|  ring + (CH)]  (16a) |  | 415 / 412 |  |  | 366 / 366 |  |  | 410 / 406 |  |  | 365 / 360 |
|  | S5(58), 2(14), 3(10) |  |  | S5(75) |  |  | S5(36), N(31) |  |  | S5(75) |
| a-d See Table 1S | | | | | | | | | | | |
